# Supplementary material for: Study on oligomerization of glutamate decarboxylase from Lactobacillus brevis using asymmetrical flow field-flow fractionation (AF4) with light scattering techniques
Source: PubMed Central journal article supplement (PMC5750328; doi:10.1007/s00216-017-0735-6), 2017-11-22

## **Analytical and Bioanalytical Chemistry**

### **Electronic Supplementary Material**

#### **Study on oligomerization of glutamate decarboxylase from *Lactobacillus brevis* using asymmetrical flow field-flow fractionation (AF4) with light scattering techniques**

Jaeyeong Choi, Seungho Lee, Javier A. Linares-Pastén, Lars Nilsson

**Fig. S1** Variation of  $d_H$  with salt concentrations at various temperatures and salt types

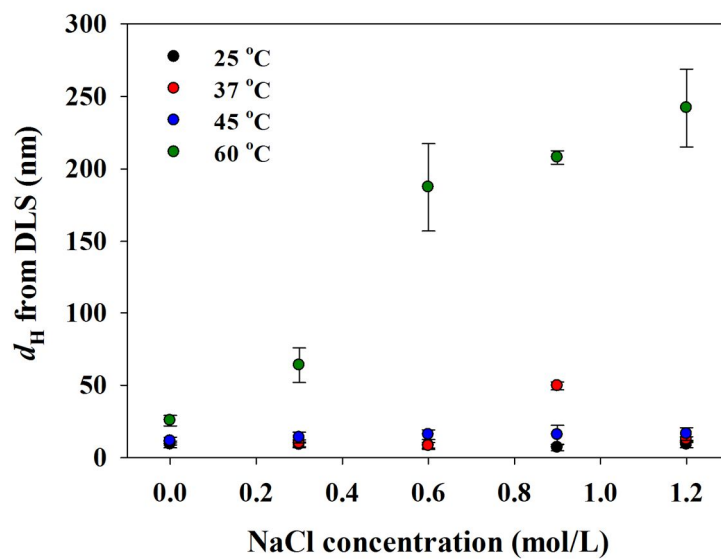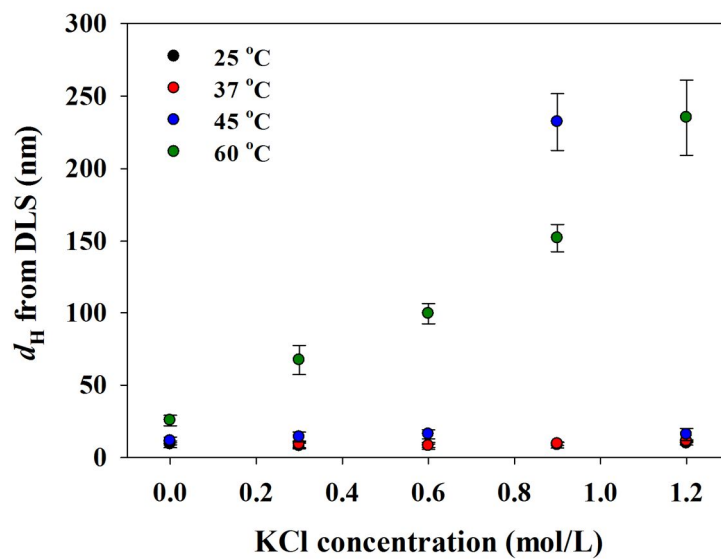

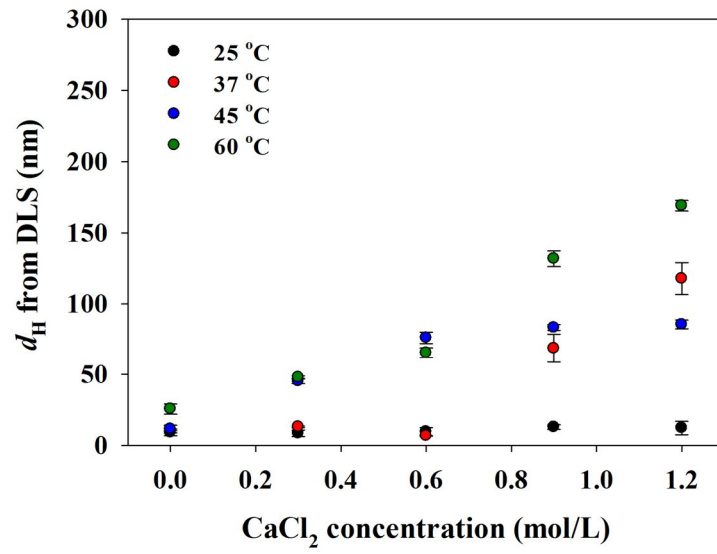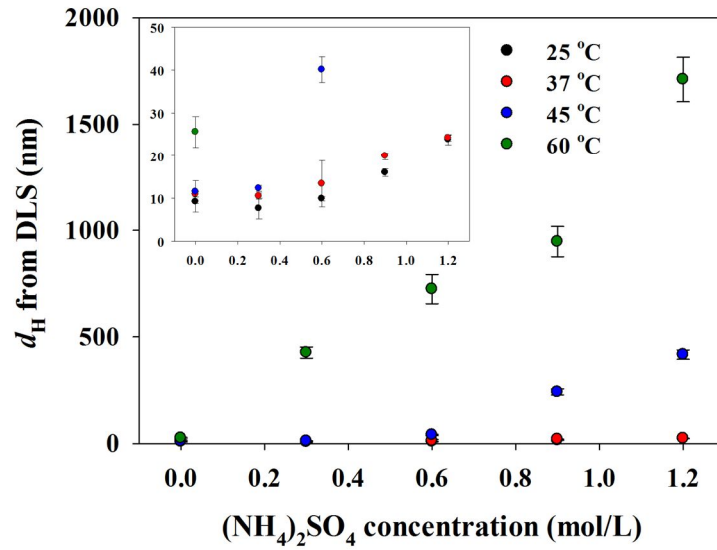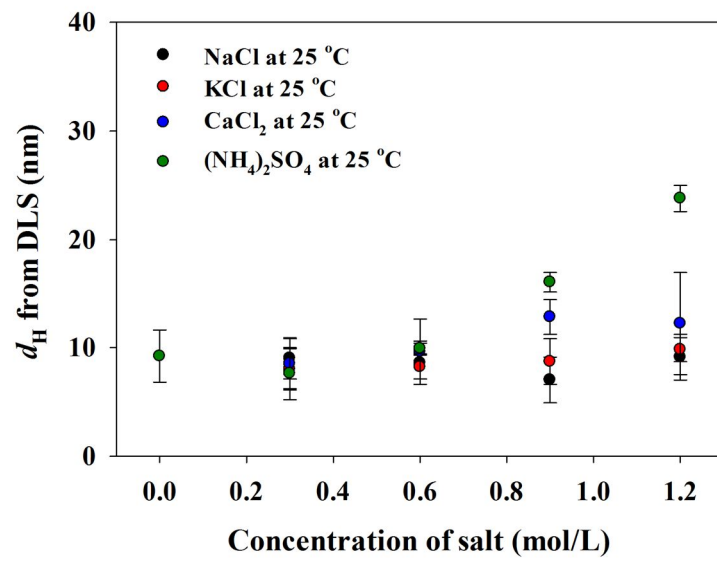

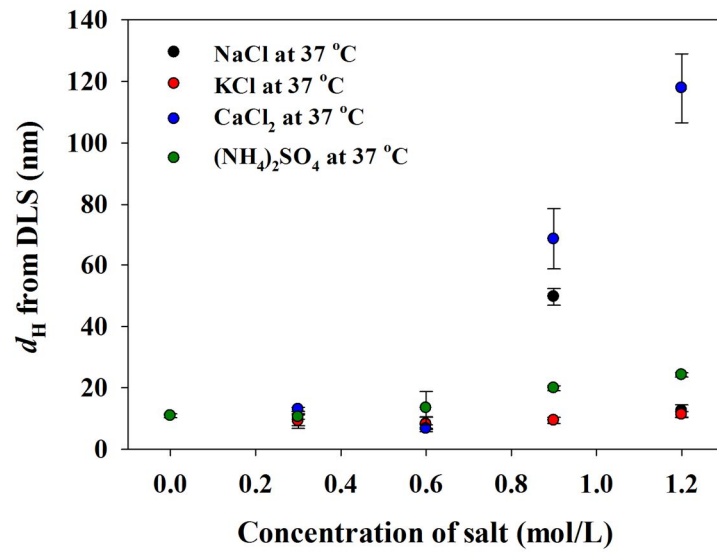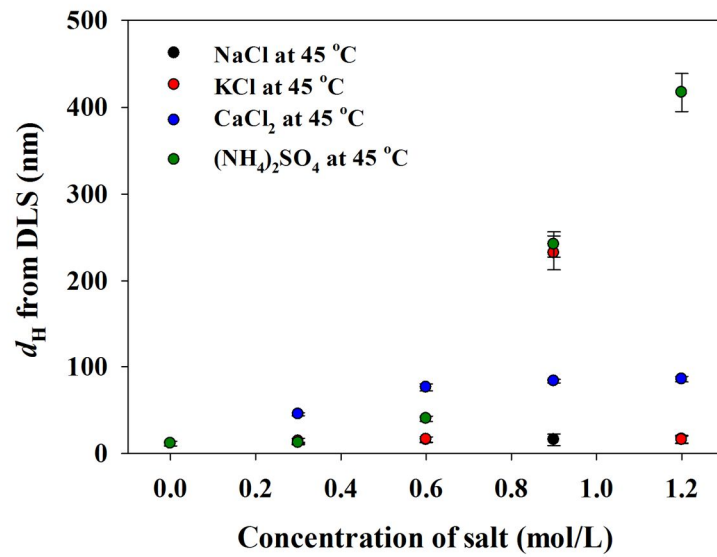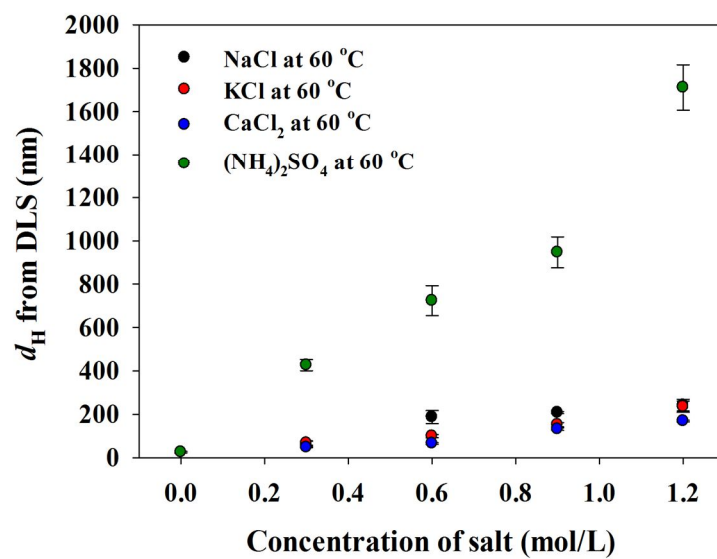

Supplement: 216_2017_735_MOESM1_ESM.pdf [file 216_2017_735_MOESM1_ESM.pdf]
